# Supplementary material
Source: Royal Society of Chemistry journal article supplement (doi:10.1039/d6tc00864j)
Supplement: d6tc00864j1.pdf [file d6tc00864j1.pdf]

# **Indirect-to direct bandgap transition in CsRESiS<sub>4</sub> (RE = Sc, Y, Lanthanides) through intrinsic charge-transfer- transitions (CTT) behaviour**

Sheng Zhang<sup>1</sup>, Peng-Xiang Qiu<sup>2</sup> and Shu-Xian Hu<sup>\*1</sup>

1) School of Mathematics and Physics, University of Science and  
Technology Beijing, Beijing, China;

2) Jiangsu Key Laboratory of Atmospheric Environment Monitoring and  
Pollution Control (AEMPC), Collaborative Innovation Center of  
Atmospheric Environment and Equipment Technology (CIC-AEET),  
School of Environmental Science and Engineering, Nanjing University of  
Information Science and Technology, Nanjing, 210044, China

\*Corresponding author Email: [hushuxian@csrc.ac.cn](mailto:hushuxian@csrc.ac.cn) (S.-X. Hu)

# 1 The structural properties of CsRESi<sub>4</sub>

Table S1. Calculated lattice constant(Å), volume (Å<sup>3</sup>) and Average bond length RE-S (Å) for CsRESi<sub>4</sub> using the PBE with the 4*f* in the core.

| Materials           | a (Å)  | b (Å) | c (Å) | V (Å <sup>3</sup> ) | RE-S (Å) |
|---------------------|--------|-------|-------|---------------------|----------|
| CsScSi <sub>4</sub> | 17.832 | 6.717 | 6.189 | 741.3               | 2.67     |
| CsYSi <sub>4</sub>  | 17.998 | 6.742 | 6.402 | 776.9               | 2.81     |
| CsLaSi <sub>4</sub> | 18.239 | 6.774 | 6.642 | 820.6               | 2.96     |
| CsCeSi <sub>4</sub> | 18.255 | 6.780 | 6.609 | 818.0               | 2.96     |
| CsPrSi <sub>4</sub> | 18.186 | 6.769 | 6.573 | 809.2               | 2.93     |
| CsNdSi <sub>4</sub> | 18.165 | 6.761 | 6.540 | 803.3               | 2.91     |
| CsPmSi <sub>4</sub> | 18.122 | 6.759 | 6.502 | 796.3               | 2.89     |
| CsSmSi <sub>4</sub> | 18.097 | 6.750 | 6.485 | 792.2               | 2.87     |
| CsEuSi <sub>4</sub> | 18.057 | 6.742 | 6.467 | 787.3               | 2.85     |
| CsGdSi <sub>4</sub> | 18.026 | 6.747 | 6.439 | 783.1               | 2.84     |
| CsTbSi <sub>4</sub> | 18.023 | 6.737 | 6.419 | 779.4               | 2.82     |
| CsDySi <sub>4</sub> | 18.011 | 6.739 | 6.396 | 776.2               | 2.81     |
| CsHoSi <sub>4</sub> | 17.995 | 6.740 | 6.378 | 773.6               | 2.80     |
| CsErSi <sub>4</sub> | 17.972 | 6.743 | 6.360 | 770.7               | 2.79     |
| CsTmSi <sub>4</sub> | 17.950 | 6.734 | 6.348 | 767.3               | 2.78     |
| CsYbSi <sub>4</sub> | 17.940 | 6.735 | 6.330 | 764.8               | 2.76     |
| CsLuSi <sub>4</sub> | 17.916 | 6.735 | 6.316 | 762.1               | 2.75     |

Table S2. Calculated lattice constant(Å), volume (Å<sup>3</sup>) and Average bond length RE-S (Å) for CsRESi<sub>4</sub> using the PBE with the 4*f* in the valence.

| Materials           | a (Å)  | b (Å) | c (Å) | V (Å <sup>3</sup> ) | RE-S (Å) |
|---------------------|--------|-------|-------|---------------------|----------|
| CsLaSi <sub>4</sub> | 18.239 | 6.772 | 6.634 | 819.3               | 2.96     |
| CsCeSi <sub>4</sub> | 18.181 | 6.751 | 6.560 | 805.2               | 2.92     |
| CsPrSi <sub>4</sub> | 18.140 | 6.737 | 6.536 | 798.8               | 2.90     |
| CsNdSi <sub>4</sub> | 18.113 | 6.732 | 6.546 | 798.2               | 2.90     |
| CsPmSi <sub>4</sub> | 18.100 | 6.721 | 6.551 | 797.0               | 2.89     |
| CsSmSi <sub>4</sub> | 18.133 | 6.727 | 6.554 | 799.4               | 2.90     |
| CsEuSi <sub>4</sub> | 18.272 | 6.641 | 6.652 | 807.2               | 2.93     |
| CsGdSi <sub>4</sub> | 18.043 | 6.748 | 6.448 | 785.0               | 2.84     |
| CsTbSi <sub>4</sub> | 18.035 | 6.737 | 6.430 | 781.4               | 2.83     |
| CsDySi <sub>4</sub> | 18.000 | 6.729 | 6.393 | 774.2               | 2.80     |
| CsHoSi <sub>4</sub> | 17.963 | 6.723 | 6.414 | 774.5               | 2.81     |
| CsErSi <sub>4</sub> | 17.895 | 6.691 | 6.365 | 762.1               | 2.79     |
| CsTmSi <sub>4</sub> | 17.957 | 6.651 | 6.328 | 755.7               | 2.82     |
| CsLuSi <sub>4</sub> | 17.934 | 6.749 | 6.332 | 766.4               | 2.76     |

Table S3. Calculated lattice constant(Å), volume (Å<sup>3</sup>) and Average bond length RE-S (Å) for CsRESi<sub>4</sub> (RE=Ce-Lu) using the PBE+*U* (*U*=3) with the 4*f* in the valence.

| Materials           | a (Å)  | b (Å) | c (Å) | V (Å <sup>3</sup> ) | RE-S (Å) |
|---------------------|--------|-------|-------|---------------------|----------|
| CsCeSi <sub>4</sub> | 18.193 | 6.750 | 6.603 | 810.8               | 2.94     |
| CsPrSi <sub>4</sub> | 18.168 | 6.743 | 6.553 | 802.8               | 2.92     |
| CsNdSi <sub>4</sub> | 18.141 | 6.742 | 6.549 | 801.0               | 2.90     |
| CsPmSi <sub>4</sub> | 18.067 | 6.737 | 6.567 | 799.4               | 2.89     |
| CsSmSi <sub>4</sub> | 18.266 | 6.629 | 6.587 | 797.6               | 2.92     |
| CsEuSi <sub>4</sub> | 18.656 | 6.297 | 6.834 | 802.9               | 2.98     |
| CsGdSi <sub>4</sub> | 18.052 | 6.749 | 6.451 | 785.9               | 2.84     |
| CsTbSi <sub>4</sub> | 18.021 | 6.740 | 6.431 | 781.1               | 2.83     |
| CsDySi <sub>4</sub> | 18.007 | 6.744 | 6.409 | 778.3               | 2.81     |
| CsErSi <sub>4</sub> | 17.960 | 6.773 | 6.400 | 778.6               | 2.80     |
| CsTmSi <sub>4</sub> | 17.886 | 6.704 | 6.303 | 755.8               | 2.81     |
| CsLuSi <sub>4</sub> | 17.933 | 6.741 | 6.315 | 763.4               | 2.76     |

Table S4. Calculated lattice constant(Å), volume (Å<sup>3</sup>) and Average bond length RE-S (Å) for CsRESi<sub>4</sub> (RE = Sm-Dy, Er, Tm, Lu) using the PBE+*U* (*U*=7) with the 4*f* in the valence.

| Materials           | a (Å)  | b (Å) | c (Å) | V (Å <sup>3</sup> ) | RE-S (Å) |
|---------------------|--------|-------|-------|---------------------|----------|
| CsCeSi <sub>4</sub> | 18.219 | 6.781 | 6.589 | 813.9               | 2.95     |
| CsPrSi <sub>4</sub> | 18.186 | 6.763 | 6.567 | 807.6               | 2.92     |
| CsNdSi <sub>4</sub> | 18.147 | 6.762 | 6.552 | 803.9               | 2.91     |
| CsPmSi <sub>4</sub> | 18.101 | 6.747 | 6.541 | 798.8               | 2.89     |
| CsSmSi <sub>4</sub> | 18.117 | 6.727 | 6.512 | 793.6               | 2.88     |
| CsEuSi <sub>4</sub> | 19.447 | 5.988 | 7.107 | 827.6               | 3.10     |
| CsGdSi <sub>4</sub> | 18.041 | 6.749 | 6.442 | 784.4               | 2.84     |
| CsTbSi <sub>4</sub> | 18.023 | 6.735 | 6.393 | 776.1               | 2.81     |
| CsDySi <sub>4</sub> | 17.991 | 6.727 | 6.377 | 771.7               | 2.80     |
| CsErSi <sub>4</sub> | 17.968 | 6.731 | 6.373 | 770.8               | 2.79     |
| CsTmSi <sub>4</sub> | 17.936 | 6.736 | 6.329 | 764.6               | 2.77     |
| CsLuSi <sub>4</sub> | 17.892 | 6.727 | 6.275 | 755.2               | 2.73     |

Tables S5. Calculated values of the magnetic moments of the RE elements in the CsRESi<sub>4</sub> compounds under the PBE+*U* conditions (*U*=3, 7 eV)

| Materials           | <i>U</i> =3 | <i>U</i> =7 |
|---------------------|-------------|-------------|
| CsScSi <sub>4</sub> | 0           | -           |
| CsYSi <sub>4</sub>  | 0           | -           |
| CsLaSi <sub>4</sub> | 0           | -           |
| CsCeSi <sub>4</sub> | 0.984       | -           |
| CsPrSi <sub>4</sub> | 2.005       | -           |
| CsNdSi <sub>4</sub> | 3.002       | -           |
| CsPmSi <sub>4</sub> | 4.129       | -           |
| CsSmSi <sub>4</sub> | 5.236       | -           |
| CsEuSi <sub>4</sub> | 6.597       | 6.919       |
| CsGdSi <sub>4</sub> | 6.982       | 7.054       |
| CsTbSi <sub>4</sub> | 5.948       | 6.061       |

|                     |       |       |
|---------------------|-------|-------|
| CsDySi <sub>4</sub> | 4.935 | 5.046 |
| CsHoSi <sub>4</sub> | 3.903 | 4.027 |
| CsErSi <sub>4</sub> | 1.072 | 2.982 |
| CsTmSi <sub>4</sub> | 1.625 | 1.971 |
| CsLuSi <sub>4</sub> | 0     | 0     |

Table S6. Calculated bandgap values (eV) of CsRESi<sub>4</sub> obtained using PBE for CsScSi<sub>4</sub> and CsYSi<sub>4</sub>, PBE+*U* (*U* = 3) for CsRESi<sub>4</sub> (RE = La–Lu), and HSE for CsRESi<sub>4</sub> (RE = La–Gd).

| Materials           | PBE  | HSE  | Expt.             |
|---------------------|------|------|-------------------|
| CsScSi <sub>4</sub> | 1.93 | -    | -                 |
| CsYSi <sub>4</sub>  | 2.59 | -    | 3.80 <sup>1</sup> |
| CsLaSi <sub>4</sub> | 2.68 | 3.61 | 3.64 <sup>2</sup> |
| CsCeSi <sub>4</sub> | 2.49 | 2.93 | -                 |
| CsPrSi <sub>4</sub> | 1.87 | 2.86 | -                 |
| CsNdSi <sub>4</sub> | 1.39 | 2.45 | -                 |
| CsPmSi <sub>4</sub> | 0.44 | 1.88 | -                 |
| CsSmSi <sub>4</sub> | 0    | 0.64 | -                 |
| CsEuSi <sub>4</sub> | 2.18 | 0.81 | -                 |
| CsGdSi <sub>4</sub> | 2.47 | 3.26 | -                 |

Tables S7. Elastic constants and deformation potential of CsXSi<sub>4</sub> compound.

| Materials           | $C_{xx}$ | $C_{yy}$ | $C_{zz}$ | $E_{xx}$ | $E_{yy}$ | $E_{zz}$ |
|---------------------|----------|----------|----------|----------|----------|----------|
| CsLaSi <sub>4</sub> | 33.50    | 44.08    | 37.48    | 6.17     | 8.71     | 9.13     |
| CsCeSi <sub>4</sub> | 34.17    | 45.90    | 35.99    | 5.26     | 8.56     | 6.12     |
| CsPrSi <sub>4</sub> | 35.22    | 45.52    | 40.65    | 6.15     | 10.04    | 6.63     |
| CsNdSi <sub>4</sub> | 35.01    | 34.28    | 41.09    | 5.58     | 7.62     | 6.30     |
| CsPmSi <sub>4</sub> | 34.72    | 43.30    | 31.06    | 4.73     | 8.61     | 7.76     |
| CsSmSi <sub>4</sub> | 34.19    | 30.46    | 38.30    | 4.07     | 13.54    | 8.20     |
| CsEuSi <sub>4</sub> | 30.10    | 22.14    | 37.33    | 3.90     | 19.71    | 5.00     |
| CsGdSi <sub>4</sub> | 44.91    | 61.56    | 58.55    | 4.91     | 10.67    | 8.76     |

## 2 The Band Structure, Projected Density of States and absorption coefficient for CsRESi<sub>4</sub>

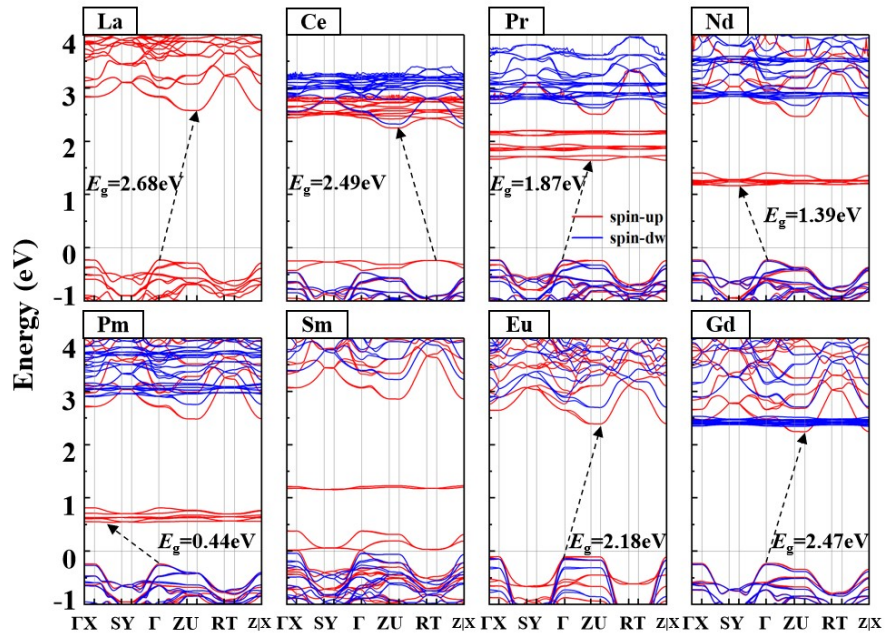

Fig. S1 Band structures calculated using PBE+ $U$  ( $U=3$  eV) for CsRESi<sub>4</sub> (RE = La–Gd).

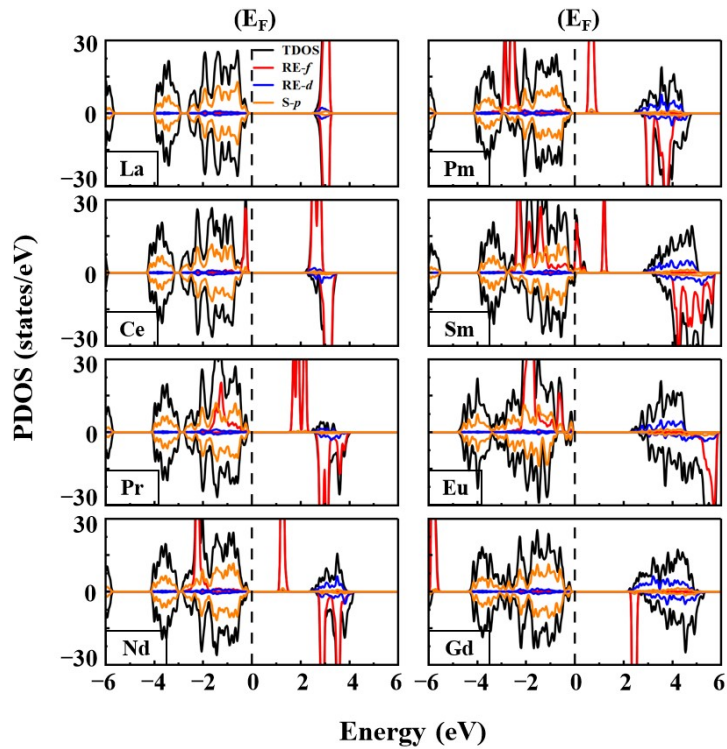

Fig. S2 Projected DOS calculated using PBE+ $U$  ( $U=3$  eV) for CsRESi<sub>4</sub> (RE = La–Gd).

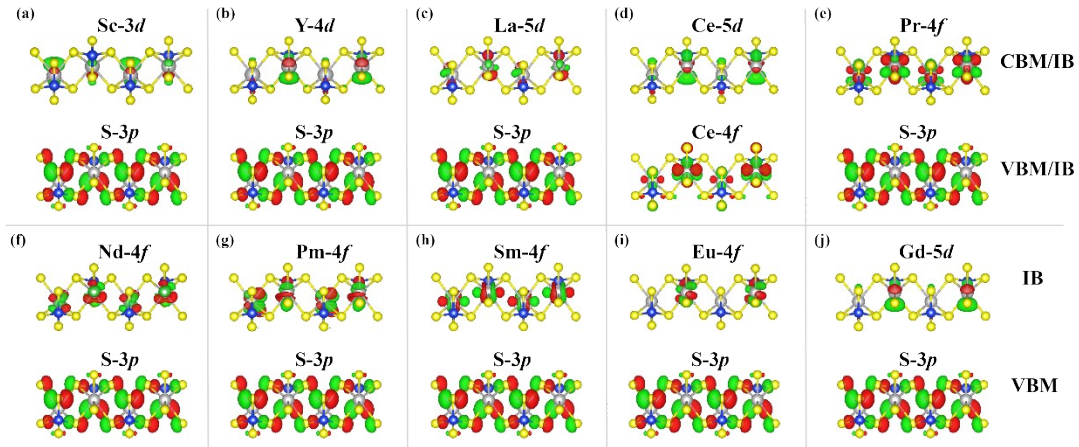

Fig. S3 Partial charge densities of the CBM, VBM and IB for CsScSi<sub>4</sub> and CsYSi<sub>4</sub> calculated using PBE, and for CsRESi<sub>4</sub> (RE = La–Gd) calculated using HSE.

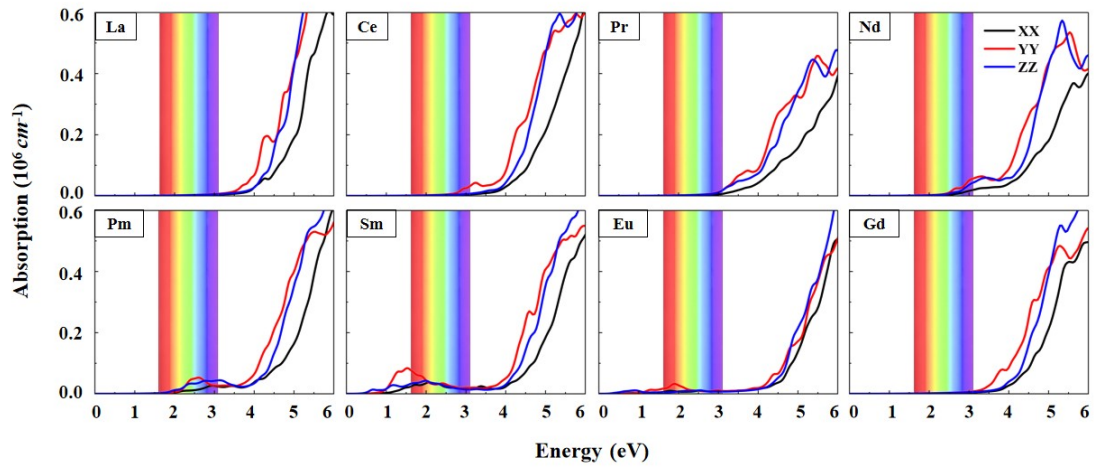

Fig. S4 Optical absorption spectra of CsRESi<sub>4</sub> (RE = La-Gd) for XX (black), YY (red), and ZZ (blue) polarized light. Colored bar: visible light range for reference.

### 3 The elastic constant and deformation potential energy for CsRESi<sub>4</sub>

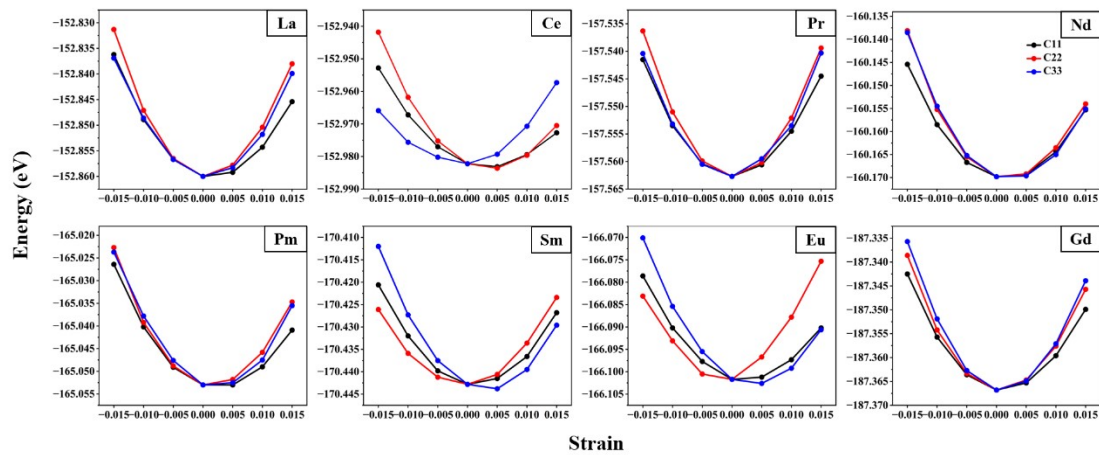

Fig. S5 The total energy of CsRESi<sub>4</sub> (RE = La-Gd) is fitted by a parabola with respect to deformation, which determines the elastic constants.

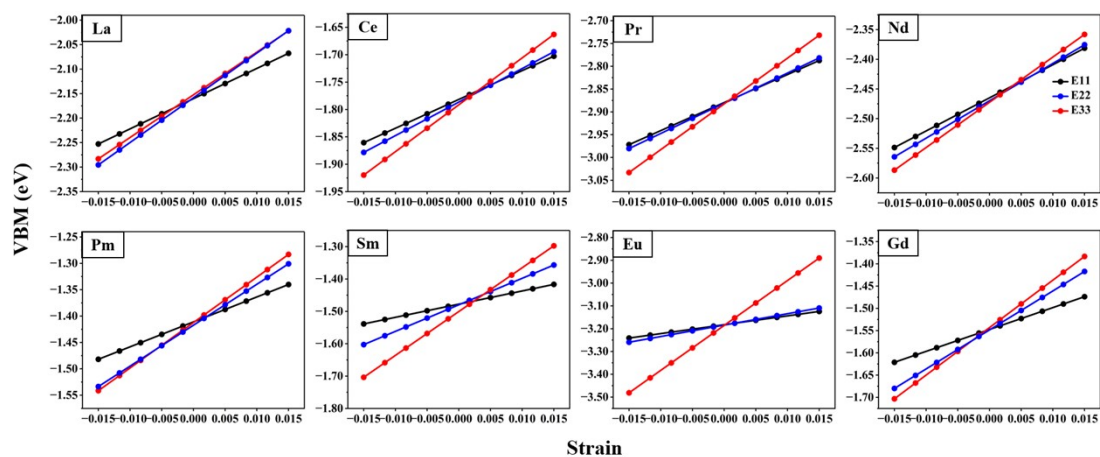

Fig. S6 The valence band edge positions of CsRESiS<sub>4</sub> (RE = La-Gd) under three different strain directions are shown. The solid lines represent the linear fits, which determine the deformation potential.

- 1 Tarasenko, M. S., Duritsyn, R. V., Potapov, D. A., Kuratieva, N. V., Ryadun, A. A., & Naumov, N. G. (2022). Double yttrium thiosilicates A YSiS<sub>4</sub> (A= Rb, Cs): synthesis, structure, optical properties. *Journal of Structural Chemistry*, 63(12), 1988-1996.
- 2 Yang, L.; Li, Z.; He, L.; Sun, J.; Wang, J.; Wang, Y.; Li, M.; Zhu, Z.; Dai, X.; Hu, S.-X.; Zhai, F.; Yang, Q.; Tao, Y.; Chai, Z.; Wang, S.; Wang, Y. Emergence of a Lanthanide Chalcogenide as an Ideal Scintillator for a Flexible X-ray Detector, *Angew. Chem. Int. Ed.*, 2023, 62, e202306465.
